# Supplementary material
Source: HighWire-hosted journal article supplement (https://qualitysafety.bmj.com/content/29/7/569)
Supplement: inline-supplementary-material-2 [file inline-supplementary-material-2.pdf]

Supplemental Table 1: Adjusted Analysis of Length of Stay (Negative Binomial Regression)

| Variable                                                | Univariate Model |          |         | Multivariable Model |         |          |         |
|---------------------------------------------------------|------------------|----------|---------|---------------------|---------|----------|---------|
|                                                         | Beta             | Estimate | p-value | Included in Model   | Beta    | Estimate | p-value |
| <b>Intervention (SIBR) vs Control</b>                   | 0.0062           | 1.0063   | 0.89    | <b>Yes</b>          | 0.022   | 1.022    | 0.58    |
| Age                                                     | -0.0081          | 0.99     | <0.0001 | Yes                 | -0.0047 | 1.00     | 0.0010  |
| Sex= Female vs Male                                     | -0.21            | 0.81     | <0.0001 | Yes                 | -0.16   | 0.85     | <0.0001 |
| Race=White vs all others                                | -0.12            | 0.88     | 0.0053  | Yes                 | -0.17   | 0.85     | <0.0001 |
| Ethnicity=Hispanic vs not Hispanic                      | 0.15             | 1.16     | 0.21    | No                  |         |          |         |
| Payer=Managed Care vs Self-pay                          | -0.39            | 0.67     | <0.0001 | Yes                 | -0.19   | 0.83     | <0.0001 |
| Payer=Medicaid vs Self-pay                              | 0.23             | 1.26     |         |                     | 0.21    | 1.24     |         |
| Payer=Medicare vs Self-pay                              | -0.15            | 0.86     |         |                     | 0.14    | 1.15     |         |
| Payer=Other vs Self-pay                                 | -0.034           | 0.97     |         |                     | 0.0030  | 1.003    |         |
| Admission Source= Clinic/Physician's Office vs Transfer | 0.12             | 0.12     | <0.0001 | Yes                 | 0.32    | 1.37     | <0.0001 |
| Admission Source= Non-Healthcare Facility vs Transfer   | 0.068            | 0.067    |         |                     | 0.092   | 1.10     |         |
| Admission Source= Outside Hospital vs Transfer          | 0.46             | 0.46     |         |                     | 0.36    | 1.43     |         |
| CHF                                                     | -0.17            | 0.85     | 0.0017  | Yes                 | -0.059  | 0.94     | 0.26    |
| COPD                                                    | -0.12            | 0.89     | 0.012   | Yes                 | -0.092  | 0.91     | 0.033   |
| Diabetes (With Complications)                           | 0.034            | 1.035    | 0.52    | No                  |         |          |         |
| Diabetes (No Complications)                             | -0.16            | 0.85     | 0.0009  | Yes                 | -0.11   | 0.89     | 0.012   |
| Hypertension                                            | -0.10            | 0.91     | 0.015   | Yes                 | -0.015  | 0.98     | 0.71    |
| Liver Disease                                           | 0.32             | 1.37     | <0.0001 | Yes                 | 0.12    | 1.13     | 0.044   |
| Neurological                                            | 0.15             | 1.16     | 0.017   | Yes                 | 0.15    | 1.16     | 0.0060  |
| Pulmonary Circulation                                   | 0.0069           | 1.0069   | 0.93    | No                  |         |          |         |
| Renal Failure                                           | 0.10             | 1.11     | 0.055   | Yes                 | 0.12    | 1.13     | 0.020   |
| Valvular                                                | 0.053            | 1.054    | 0.55    | No                  |         |          |         |
| CCI                                                     | 0.0025           | 1.0025   | 0.67    | No                  |         |          |         |
| ICU                                                     | 0.91             | 2.49     | <0.0001 | Yes                 | 0.82    | 2.28     | <0.0001 |

Beta: coefficient in Negative Binomial Model; estimate: rate ratio for estimated length of stay

Multivariable Model: Included all significant ( $p < 0.1$ ) variables from univariate analysis. Negative Binomial regression was used (instead of Poisson) because the outcomes were counts, but there was overdispersion in the Poisson model.

Supplemental Table 2: Adjusted Analysis of Readmission within 30 days (Logistic Regression)

| Variable                                                | Univariate Model |          |         | Multivariable Model |         |          |         |
|---------------------------------------------------------|------------------|----------|---------|---------------------|---------|----------|---------|
|                                                         | Beta             | Estimate | p-value | Included in Model   | Beta    | Estimate | p-value |
| <b>Intervention (SIBR) vs Control</b>                   | -0.24            | 0.78     | 0.034   | <b>Yes</b>          | -0.21   | 0.81     | 0.074   |
| Age                                                     | -0.0033          | 1.00     | 0.29    | No                  |         |          |         |
| Sex= Female vs Male                                     | -0.093           | 0.91     | 0.40    | No                  |         |          |         |
| Race=White vs all others                                | 0.064            | 1.07     | 0.59    | No                  |         |          |         |
| Ethnicity=Hispanic vs not Hispanic                      | -2.00            | 0.14     | 0.0055  | Yes                 | -1.86   | 0.16     | 0.011   |
| Payer=Managed Care vs Self-pay                          | 0.18             | 1.20     | 0.0003  | Yes                 | -0.053  | 0.95     | 0.0088  |
| Payer=Medicaid vs Self-pay                              | 0.88             | 2.41     |         |                     | 0.50    | 1.64     |         |
| Payer=Medicare vs Self-pay                              | 0.50             | 1.66     |         |                     | -0.0034 | 1.00     |         |
| Payer=Other vs Self-pay                                 | -0.0034          | 1.00     |         |                     | -0.41   | 0.66     |         |
| Admission Source= Clinic/Physician's Office vs Transfer | -0.38            | 0.69     | 0.077   | Yes                 | -0.39   | 0.67     | 0.25    |
| Admission Source= Non-Healthcare Facility vs Transfer   | -0.19            | 0.83     |         |                     | -0.29   | 0.74     |         |
| Admission Source= Outside Hospital vs Transfer          | -0.50            | 0.61     |         |                     | -0.48   | 0.62     |         |
| CHF                                                     | 0.51             | 1.67     | <0.0001 | Yes                 | 0.13    | 1.14     | 0.37    |
| COPD                                                    | 0.31             | 1.36     | 0.011   | Yes                 | 0.070   | 1.072    | 0.59    |
| Diabetes (With Complications)                           | 0.54             | 1.71     | <0.0001 | Yes                 | 0.18    | 1.20     | 0.22    |
| Diabetes (No Complications)                             | 0.038            | 1.038    | 0.77    | No                  |         |          |         |
| Hypertension                                            | 0.41             | 1.50     | 0.0003  | Yes                 | 0.14    | 1.15     | 0.27    |
| Liver Disease                                           | 0.56             | 1.74     | 0.0008  | Yes                 | 0.38    | 1.46     | 0.031   |
| Neurological                                            | -0.043           | 0.96     | 0.80    | No                  |         |          |         |
| Pulmonary Circulation                                   | 0.45             | 1.56     | 0.014   | Yes                 | 0.20    | 1.23     | 0.29    |
| Renal Failure                                           | 0.77             | 2.17     | <0.0001 | Yes                 | 0.37    | 1.44     | 0.015   |
| Valvular                                                | 0.25             | 1.29     | 0.26    | No                  |         |          |         |
| CCI                                                     | 0.11             | 1.11     | <0.0001 | Yes                 | 0.062   | 1.064    | 0.0008  |
| ICU                                                     | 0.42             | 1.52     | 0.0005  | Yes                 | 0.35    | 1.45     | 0.0042  |

Beta: coefficient in Negative Binomial Model; estimate: odds ratio for readmission

Multivariable Model: Included all significant ( $p < 0.1$ ) variables from univariate analysis.

\*Could not include discharge disposition due to violations of model assumptions (i.e. not enough data in each group by the outcome variable readmission at 30 days)

Supplemental Table 3: Adjusted Analysis of Readmission within 7 days (Logistic Regression)

| Variable                                                | Univariate Model |          |         | Multivariable Model |       |          |         |
|---------------------------------------------------------|------------------|----------|---------|---------------------|-------|----------|---------|
|                                                         | Beta             | Estimate | p-value | Included in Model   | Beta  | Estimate | p-value |
| <b>Intervention (SIBR) vs Control</b>                   | -0.39            | 0.68     | 0.020   | <b>Yes</b>          | -0.36 | 0.70     | 0.034   |
| Age                                                     | -0.0024          | 1.00     | 0.61    | No                  |       |          |         |
| Sex= Female vs Male                                     | -0.11            | 0.90     | 0.51    | No                  |       |          |         |
| Race=White vs all others                                | -0.13            | 0.88     | 0.47    | No                  |       |          |         |
| Ethnicity=Hispanic vs not Hispanic                      | -0.96            | 0.38     | 0.19    | No                  |       |          |         |
| Payer=Managed Care vs Self-pay                          | -0.60            | 0.55     | 0.15    | No                  |       |          |         |
| Payer=Medicaid vs Self-pay                              | 0.21             | 1.24     |         |                     |       |          |         |
| Payer=Medicare vs Self-pay                              | -0.13            | 0.88     |         |                     |       |          |         |
| Payer=Other vs Self-pay                                 | -0.12            | 0.89     |         |                     |       |          |         |
| Admission Source= Clinic/Physician's Office vs Transfer | -1.13            | 0.32     | 0.14    | No                  |       |          |         |
| Admission Source= Non-Healthcare Facility vs Transfer   | -0.34            | 0.71     |         |                     |       |          |         |
| Admission Source= Outside Hospital vs Transfer          | -0.54            | 0.58     |         |                     |       |          |         |
| CHF                                                     | 0.62             | 1.87     | 0.0006  | Yes                 | 0.36  | 1.43     | 0.075   |
| COPD                                                    | 0.25             | 1.29     | 0.15    | No                  |       |          |         |
| Diabetes (With Complications)                           | 0.68             | 1.97     | 0.0002  | Yes                 | 0.49  | 1.63     | 0.015   |
| Diabetes (No Complications)                             | 0.0084           | 1.0085   | 0.96    | No                  |       |          |         |
| Hypertension                                            | 0.16             | 1.17     | 0.33    | No                  |       |          |         |
| Liver Disease                                           | 0.56             | 7.75     | 0.017   | Yes                 | 0.39  | 1.48     | 0.11    |
| Neurological                                            | -0.13            | 0.88     | 0.63    | No                  |       |          |         |
| Pulmonary Circulation                                   | 0.57             | 1.77     | 0.021   | Yes                 | 0.40  | 1.49     | 0.13    |
| Renal Failure                                           | 0.50             | 1.65     | 0.0081  | Yes                 | 0.11  | 1.12     | 0.62    |
| Valvular                                                | 0.52             | 1.68     | 0.078   | Yes                 | 0.17  | 1.12     | 0.59    |
| CCI                                                     | 0.072            | 1.075    | 0.0005  | Yes                 | 0.026 | 1.026    | 0.32    |
| ICU                                                     | 0.50             | 1.65     | 0.0039  | Yes                 | 0.45  | 1.57     | 0.011   |

Beta: coefficient in Negative Binomial Model; estimate: odds ratio for readmission

Multivariable Model: Included all significant ( $p < 0.1$ ) variables from univariate analysis.

\*Could not include discharge disposition due to violations of model assumptions (i.e. not enough data in each group by the outcome variable readmission at 7 days)

Supplemental Table 4: Subgroup Analysis- Testing for differential effect of intervention vs control by subgroups

| Variable              | Length of Stay |         | 30-day Readmission |         | 7-day Readmission |         |
|-----------------------|----------------|---------|--------------------|---------|-------------------|---------|
|                       | Beta           | p-value | Beta               | p-value | Beta              | p-value |
| ICU transfer to floor | -0.64          | 0.39    | -0.59              | 0.73    | 1.0018            | 0.58    |
| Floor to discharge    | -0.092         | 0.30    | 0.093              | 0.71    | -0.019            | 0.96    |
| Age>65                | 0.048          | 0.58    | -0.26              | 0.27    | -0.49             | 0.15    |
| Female vs Male        | -0.10          | 0.23    | -0.29              | 0.21    | -0.80             | 0.019*  |
| White vs Nonwhite     | 0.033          | 0.72    | -0.071             | 0.78    | 0.062             | 0.86    |
| CCI: 0-3 vs 7+        | -0.19          | 0.11    | 0.022              | 0.94    | 0.38              | 0.37    |
| CCI: 3-7 vs 7+        | -0.24          | 0.059   | -0.069             | 0.82    | 0.11              | 0.80    |

Beta: beta estimate for interaction between intervention vs control and variable

p-value: p-value for the interaction between intervention vs control and variable

Interpretation: For p-values>0.05, there is no differential effect of intervention vs control by levels of the variable. I.e. Outcomes are similar across levels of the variable comparing intervention vs control.

p-value <0.05 means that there is a differential effect of intervention vs control by levels of the variable.
